# Supplementary material for: Fully-occupied Keggin type polyoxometalate as solid base for catalyzing CO2 cycloaddition and Knoevenagel condensation
Source: Royal Society of Chemistry journal article supplement (doi:10.1039/c5cy01038a), 2015-10-15
Supplement: c5cy01038a1.pdf [file c5cy01038a1.pdf]

## Supporting information

for

### Fully-occupied Keggin type polyoxometalate as solid base for catalyzing CO<sub>2</sub> cycloaddition and Knoevenagel condensation

WeilinGe, Xiaochen Wang, Lingyu Zhang, Lei Du, Yu Zhou,\* Jun Wang\*

State Key Laboratory of Materials-Oriented Chemical Engineering, College of Chemical Engineering, Nanjing Tech University (former Nanjing University of Technology), Nanjing, 210009, P. R. China. Corresponding authors. Tel: +86-25-83172264. Fax: +86-25-83172261.

E-mail: njtzhouyu@njtech.edu.cn (Y. Zhou); junwang@njtech.edu.cn (J. Wang).

Table S1. Catalytic performances of different catalysts in Knoevenagel condensation of benzaldehyde and ethyl cyanoacetate.<sup>a</sup>

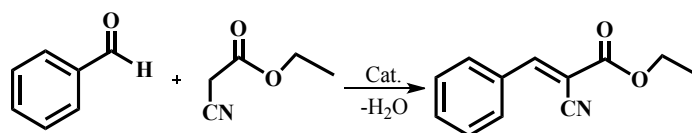

| Entry          | Catalyst             | Time(h) | Yield(%) |
|----------------|----------------------|---------|----------|
| 1              | NaSiNb <sub>12</sub> | 2       | 59.3     |
| 2              | NaSiNb <sub>12</sub> | 6       | 89.6     |
| 3 <sup>b</sup> | Na-A-PW <sub>9</sub> | 6       | 80       |

[a] Reaction conditions: catalyst (0.25 mol% to benzaldehyde), benzaldehyde 10mmol, ethyl cyanoacetate 10mmol, 25 °C, 2mL ethanol. [b] The result is cited from the Ref. 15, reaction conditions: benzaldehyde (1 mmol), Na-A-PW<sub>9</sub> (0.25 mol% to benzaldehyde), ethyl cyanoacetate (1.5 mmol), 0.2 mL methanol, 25 °C, 6 h.

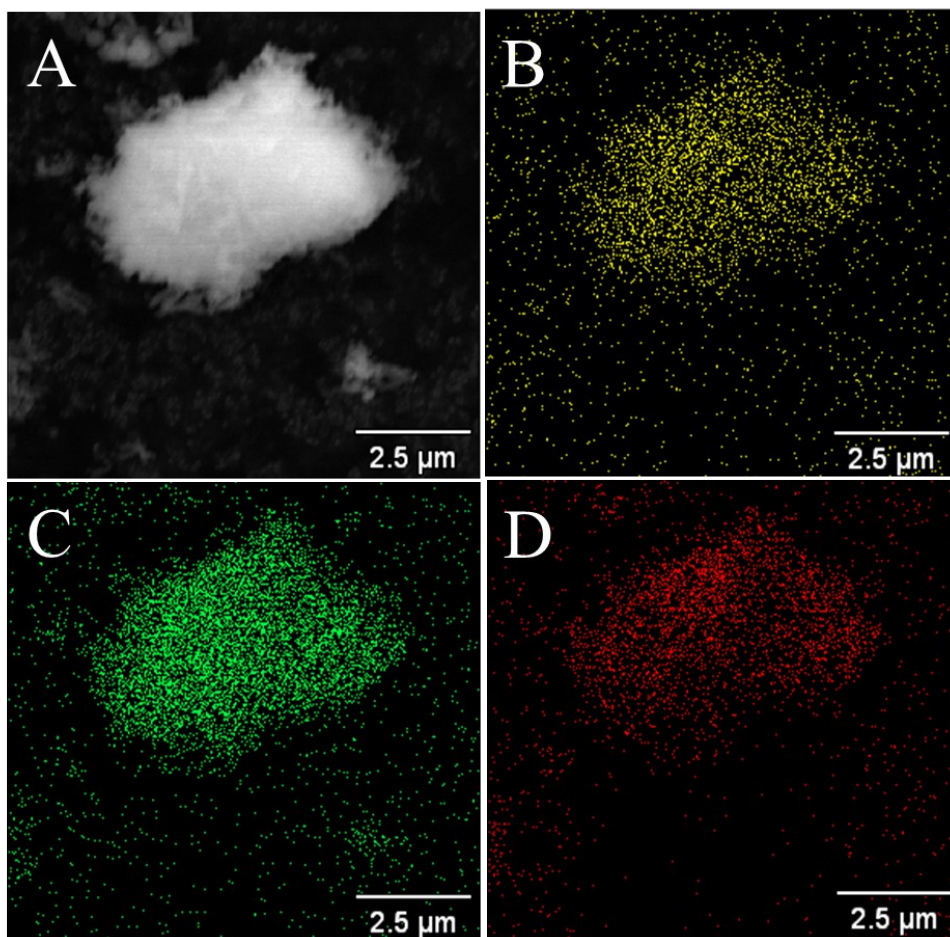

Figure S1 SEM (A) and elemental mapping images of (B) Si, (C) Nb and (D) O element for  $\text{NaSiNb}_{12}$ .

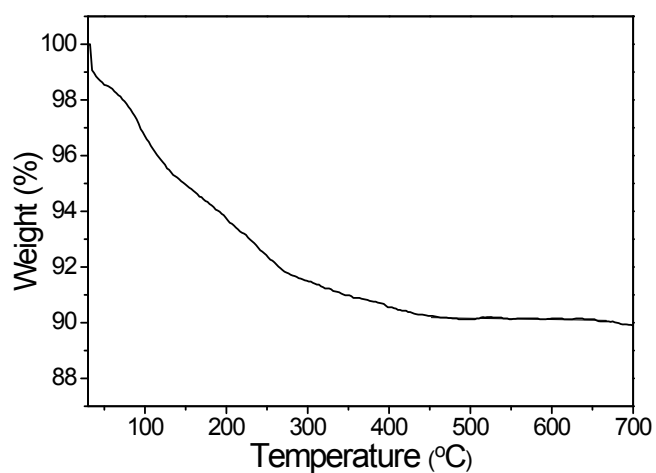

Figure S2 TG curve of  $\text{NaSiNb}_{12}$ . The weight loss below 200 °C was due to desorption of adsorbed water. In the next temperature range 200-450 °C, the weight loss is attributable to the loss of the crystalline water molecular and the 3.16% weight loss in this temperature range is close to the calculated one (3.32%) by assuming that one POM unit possessed four crystalline water molecular. Nevertheless, the synthesized  $\text{NaSiNb}_{12}$  of this work was not in single-crystal form, and it is hard to exactly determine the crystalline water by TG. Therefore, the formula of  $\text{NaSiNb}_{12}$  may be  $\text{Na}_{16}[\text{SiNb}_{12}\text{O}_{40}] \cdot x\text{H}_2\text{O}$  ( $x \approx 4-5$ ).

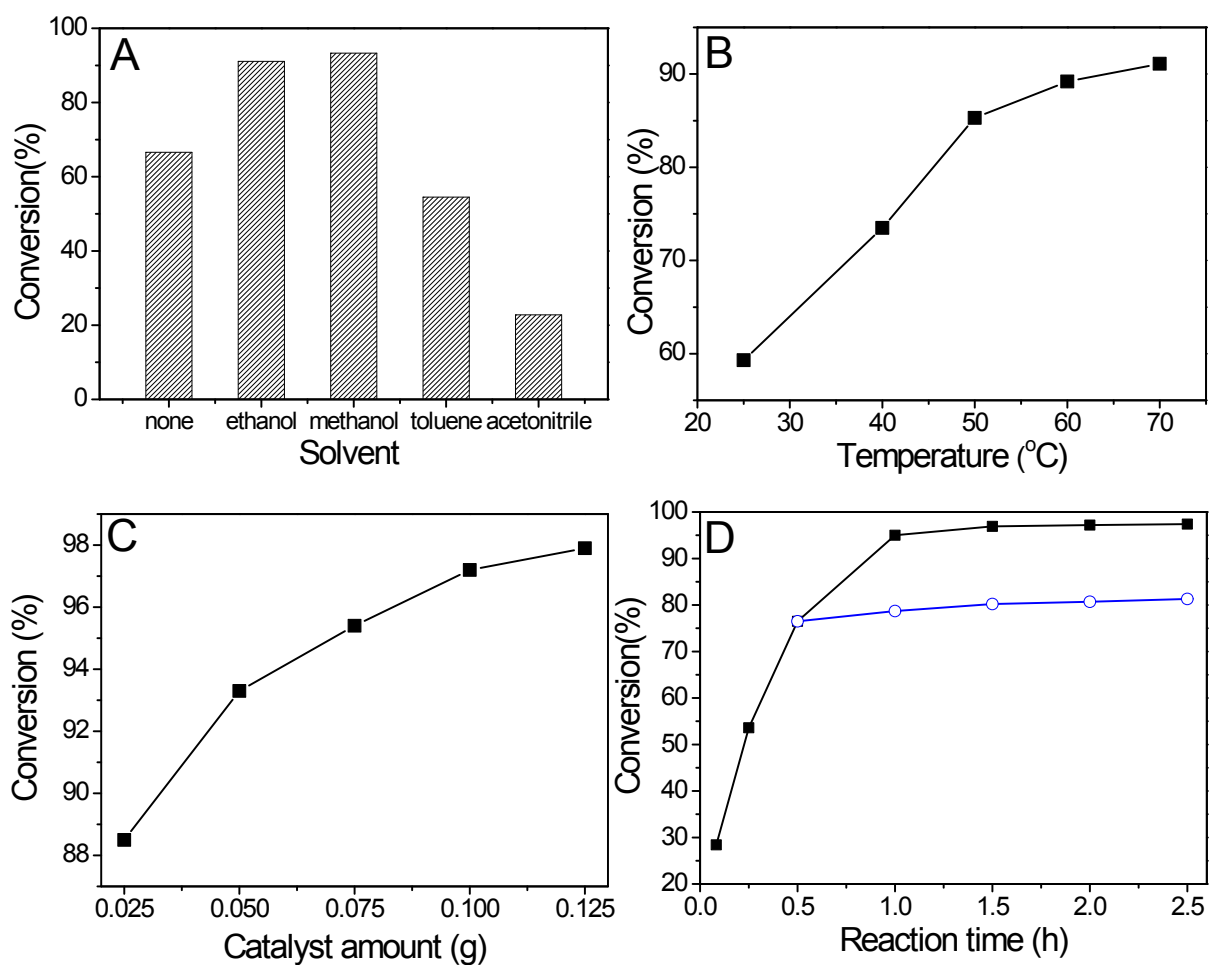

Figure S3 (A) The effect of solvent on the conversion over  $\text{NaSiNb}_{12}$ . Reaction conditions: 0.05 g catalyst, 2 mL solvent (if needed), 2 h, 343 K. (B) The effect of temperature on the conversion over  $\text{NaSiNb}_{12}$ . Reaction conditions: 0.05 g catalyst, 2 mL ethanol, 2 h, 343 K. (C) The effect of catalyst amount on the conversion over  $\text{NaSiNb}_{12}$ . Reaction conditions: 2 mL methanol, 2 h, 343 K. (D) The effect of reaction time on the conversion over  $\text{NaSiNb}_{12}$  (The reaction results in blue line after 0.5 h was conducted with catalyst removed). Reaction conditions: 0.1 g catalyst, 2 mL methanol, 343 K. All reactions are done with 10 mmol benzaldehyde and 10 mmol ethyl cyanoacetate.
